# Supplementary material for: Decision-making under explicit risk is impaired in multiple sclerosis: relationships with ventricular width and disease disability
Source: Springer Nature journal article supplement (doi:10.1186/s12883-015-0318-0), 2015-04-22
Supplement: MOESM3 [file 9742328]

Additional file 3

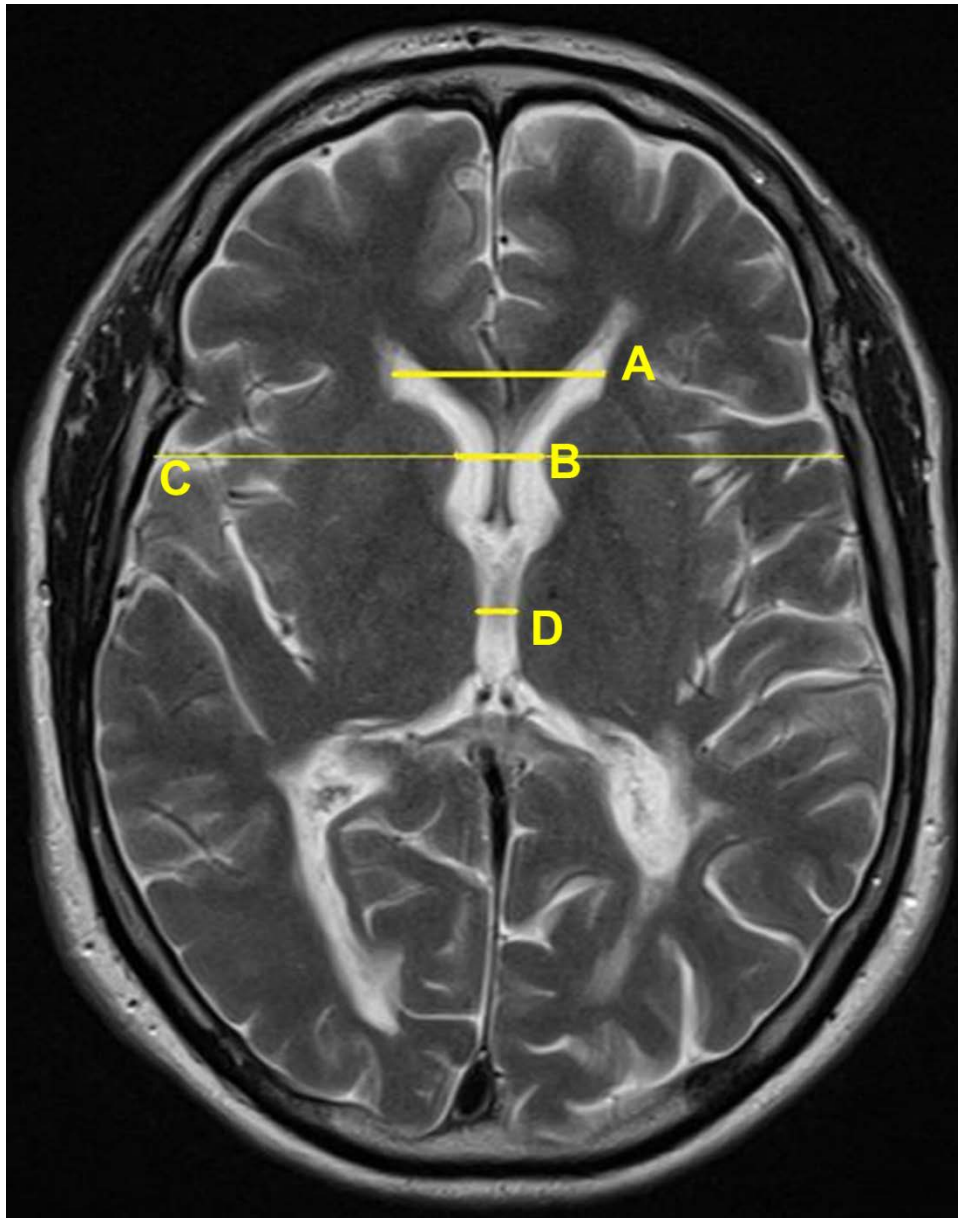

**Figure caption:** Example 2-D linear measurements on a T2-weighted axial magnetic resonance image. **A:** Frontal Horn Width (FHW); **B:** Intercaudate Distance (ICD); **C:** Transverse Width (TW; used as denominator for the Frontal Horn Ratio (FHR = FHW/TW), Intercaudate Ratio (ICR = ICR/TW) and Third Ventricle Ratio (TVR = TVW/TW); **D:** Third Ventricle Width (TVW).
